# Supplementary material
Source: PubMed Central journal article supplement (PMC4913330)
Supplement: TAG637532_Supplementary_Tables.pdf [file TAG637532_Supplementary_Tables.pdf]

**Supplementary Table 1. Comparison of patients with and without active postal address**

|                                                     | <b>Study population with active postal address (n=872)</b> | <b>Study population without active postal address (n=138)</b> | <b>p-value</b> |
|-----------------------------------------------------|------------------------------------------------------------|---------------------------------------------------------------|----------------|
| <b>Demographic characteristic</b>                   |                                                            |                                                               |                |
| Age at diagnosis (y), mean $\pm$ standard deviation | 43.4 $\pm$ 16.2                                            | 45.2 $\pm$ 18.4                                               | 0.48           |
| Female, n (%)                                       | 655 (75)                                                   | 103 (75)                                                      | 0.9            |
| <b>Diagnostic characteristics and comorbidities</b> |                                                            |                                                               |                |
| TTG† level (U/mL), mean $\pm$ standard deviation    | 100.5 +/- 78.2                                             | 87.2 +/- 61.4                                                 | 0.18           |
| Hypothyroidism                                      | 103 (12)                                                   | 15 (11)                                                       | 0.75           |
| Type 1 Diabetes                                     | 50 (6)                                                     | 11 (8)                                                        | 0.31           |
| Depression                                          | 134 (15)                                                   | 13 (9)                                                        | 0.07           |
| Anxiety                                             | 63 (7)                                                     | 5 (4)                                                         | 0.12           |
| Bipolar Disorder                                    | 7 (1)                                                      | 1 (1)                                                         | 0.92           |
| <b>Symptoms at presentation</b>                     |                                                            |                                                               |                |
| <b>Diarrhea</b>                                     | <b>376 (43)</b>                                            | <b>44 (32)</b>                                                | <b>0.01</b>    |
| Weight loss                                         | 168 (19)                                                   | 26 (19)                                                       | 0.91           |
| Anemia                                              | 197 (23)                                                   | 27 (20)                                                       | 0.43           |
| Fatigue                                             | 83 (10)                                                    | 14 (10)                                                       | 0.82           |
| Abdominal Pain                                      | 300 (34)                                                   | 36 (26)                                                       | 0.054          |

†IgA tissue transglutaminase, reference range <19 U/mL



**Supplementary Table 2: Patient characteristics by per-capita income quartile**

| Per-capita income quartile          | Quartile 1<br>(n = 218) | Quartile 2<br>(n = 218) | Quartile 3<br>(n = 218) | Quartile 4<br>(n = 218) | p-value |
|-------------------------------------|-------------------------|-------------------------|-------------------------|-------------------------|---------|
| Mean per-capita income              | \$19,438.34             | \$26,688.78             | \$34,442.27             | \$53,455.02             |         |
| Female, n (%)                       | 165 (76)                | 172 (79)                | 165 (76)                | 148 (68)                | 0.08    |
| Age at diagnosis (y)                | 41.3                    | 43.2                    | 44.1                    | 44.7                    | 0.42    |
| TTG‡ level (U/mL)                   | 98                      | 104                     | 111                     | 91                      | 0.26    |
| Comorbid autoimmune disease, n (%)  | 52 (24)                 | 58 (26)                 | 47 (22)                 | 48 (22)                 | 0.59    |
| Comorbid psychiatric disease, n (%) | 48 (22)                 | 47 (22)                 | 46 (21)                 | 43 (20)                 | 0.94    |

‡IgA tissue transglutaminase, reference range <19 U/mL

**Supplementary Table 3. Multivariate analysis: Predictors of CD diagnosis without gastrointestinal symptoms**

| Variables                           | OR          | 95% CI           | p-value     |
|-------------------------------------|-------------|------------------|-------------|
| <b>Sex</b>                          |             |                  |             |
| Male                                | 1           |                  |             |
| <b>Female</b>                       | <b>0.60</b> | <b>0.40-.91</b>  | <b>0.02</b> |
| <b>Age (y)</b>                      |             |                  |             |
| 1-32                                | 1           |                  |             |
| 32-41                               | 1.06        | 0.62-1.84        | 0.82        |
| <b>42-55</b>                        | <b>1.91</b> | <b>1.12-3.25</b> | <b>0.02</b> |
| 56+                                 | 1.51        | 0.88-2.57        | 0.13        |
| <b>Co-morbid autoimmune disease</b> |             |                  |             |
| No                                  | 1           |                  |             |

|                                      |             |                  |              |
|--------------------------------------|-------------|------------------|--------------|
| <b>Yes</b>                           | <b>1.71</b> | <b>1.05-2.78</b> | <b>0.007</b> |
| <b>Co-morbid psychiatric disease</b> |             |                  |              |
| No                                   | 1           |                  |              |
| Yes                                  | 0.76        | 0.49-1.18        | 0.22         |
| <b>Per-capita income quartile</b>    |             |                  |              |
| Quartiles 1-2                        | 1           |                  |              |
| <b>Quartiles 3-4</b>                 | <b>1.71</b> | <b>1.17-2.50</b> | <b>0.006</b> |
